# Supplementary material for: Rapid diagnosis of lymph node metastasis in breast cancer using a new fluorescent method with γ-glutamyl hydroxymethyl rhodamine green
Source: PubMed Central journal article supplement (PMC4899706; doi:10.1038/srep27525), 2016-06-09

Title: Rapid diagnosis of lymph node metastasis in breast cancer using a new fluorescent method with  $\gamma$ -glutamyl hydroxymethyl rhodamine green

Authors: Yoshiaki Shinden<sup>1, 5\*</sup>, Hiroki Ueo<sup>1, 7\*</sup>, Taro Tobo<sup>2</sup>, Ayako Gamachi<sup>3</sup>, Mitsuaki Utou<sup>2</sup>, Hisateru Komatsu<sup>1</sup>, Sho Nambara<sup>1</sup>, Tomoko Saito<sup>1</sup>, Masami Ueda<sup>1</sup>, Hidenari Hirata<sup>1</sup>, Shotaro Sakimura<sup>1</sup>, Yuki Takano<sup>1</sup>, Ryutarou Uchi<sup>1</sup>, Junji Kurashige<sup>1</sup>, Sayuri Akiyoshi<sup>1</sup>, Tomohiro Iguchi<sup>1</sup>, Hidetoshi Eguchi<sup>1</sup>, Keishi Sugimachi<sup>1</sup>, Yoko Kubota<sup>4</sup>, Yuichiro Kai<sup>4</sup>, Kenji Shibuta<sup>4</sup>, Yuko Kijima<sup>5</sup>, Heiji Yoshinaka<sup>5</sup>, Shoji Natsugoe<sup>5</sup>, Masaki Mori<sup>6</sup>, Yoshihiko Maehara<sup>7</sup>, Masayo Sakabe<sup>8</sup>, Mako Kamiya<sup>8</sup>, John W. Kakareka<sup>9</sup>, Thomas J. Pohida<sup>9</sup>, Peter L. Choyke<sup>10</sup>, Hisataka Kobayashi<sup>10</sup>, Hiroaki Ueo<sup>4</sup>, Yasuteru Urano<sup>8, 11</sup> and Koshi Mimori<sup>1</sup>

\* These authors contributed equally to this work.

## Figure legend

Supplementary figure 1: A flow chart depicting the selection of the enrolled patients and evaluation of the lymph nodes.

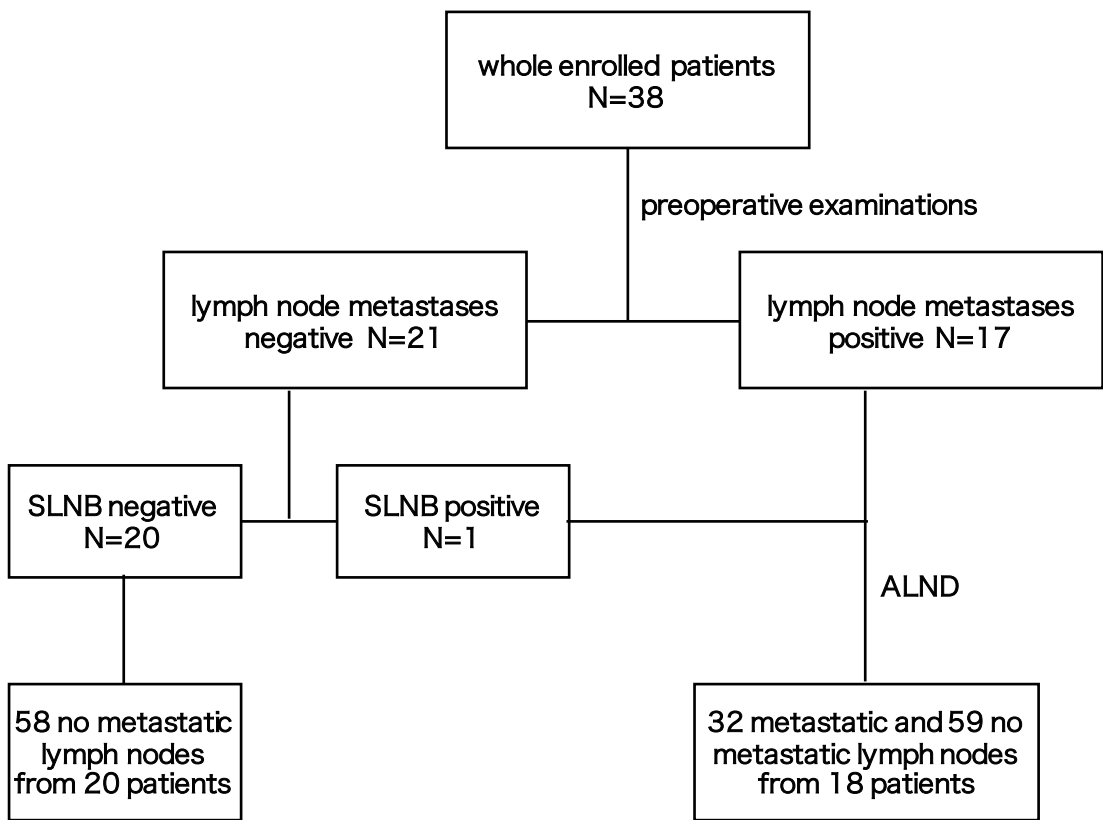

Supplement: srep27525-s1.pdf [file srep27525-s1.pdf]
